# Supplementary material for: An inverted planar solar cell with 13% efficiency and a sensitive visible light detector based on orientation regulated 2D perovskites
Source: Royal Society of Chemistry journal article supplement (doi:10.1039/c8ta08203k), 2018-01-01
Supplement: c8ta08203k1.pdf [file c8ta08203k1.pdf]

## Supporting Information

### Inverted Planar Solar Cell with 13% Efficiency and Sensitive Visible Light Detector Based on Orientation Regulated 2D Perovskites

Xiaomei Lian,<sup>a</sup> Jiehuan Chen,<sup>a</sup> Ruilin Fu,<sup>a</sup> Tsz-Ki Lau,<sup>b</sup> Yingzhu Zhang,<sup>a</sup> Gang Wu\*,<sup>a</sup> Xinhui Lu,<sup>b</sup> Yanjun Fang,<sup>c</sup> Deren Yang<sup>c</sup> and Hongzheng Chen\*<sup>a</sup>

<sup>a</sup>State Key Laboratory of Silicon Materials, MOE Key Laboratory of Macromolecular Synthesis and Functionalization, Department of Polymer Science and Engineering, Zhejiang University, Hangzhou 310027, P. R. China. E-mails: [samy@zju.edu.cn](mailto:samy@zju.edu.cn), [hzchen@zju.edu.cn](mailto:hzchen@zju.edu.cn)

<sup>b</sup>Department of Physics, The Chinese University of Hong Kong, New Territories 999077, Hong Kong, P. R. China

<sup>c</sup>State Key Laboratory of Silicon Materials, School of Materials Science and Engineering, Zhejiang University, Hangzhou 310027, P. R. China

**Keywords:** 2D perovskite, Morphology regulation, Additive, Merged annealing, High fill factor

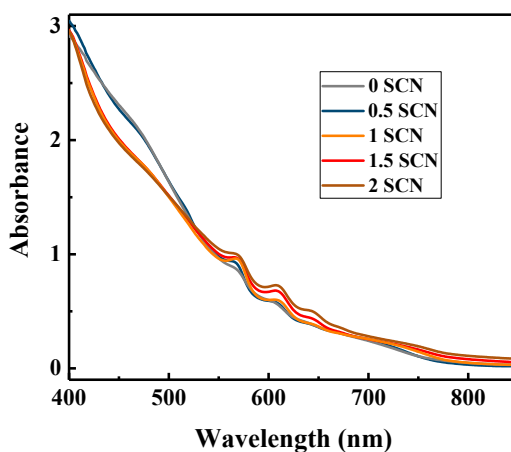

**Fig. S1** Absorption spectra of (PEA)<sub>2</sub>(MA)<sub>4</sub>Pb<sub>5</sub>I<sub>16</sub> (n = 5) perovskite films with various amounts of NH<sub>4</sub>SCN additive on ITO/PEDOT:PSS substrate.

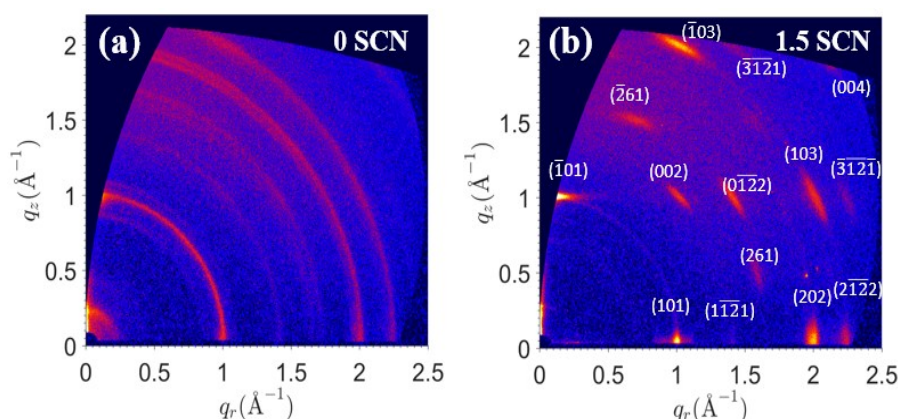

**Fig. S2** 2D GIWAXS patterns of (PEA)<sub>2</sub>(CH<sub>3</sub>NH<sub>3</sub>)<sub>4</sub>Pb<sub>5</sub>I<sub>16</sub> (n=5) films made by MA process (a) without and (b) with 1.5 SCN addition.

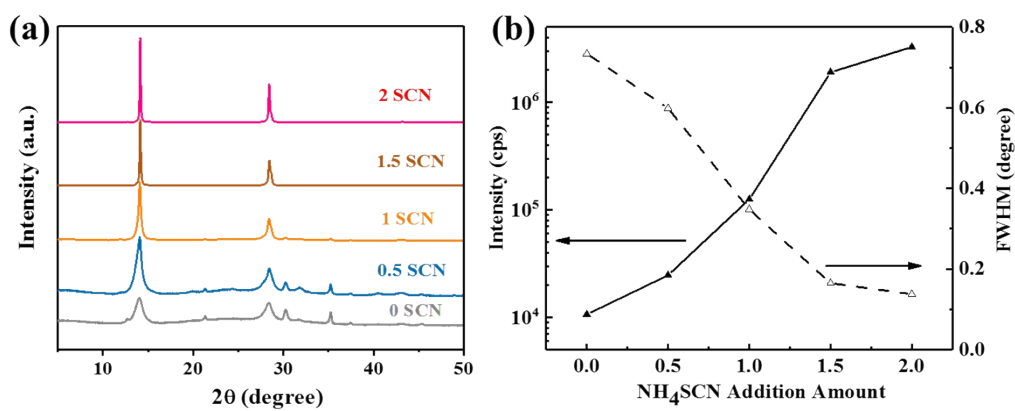

**Fig. S3** (a) XRD patterns and (b) the corresponding diffraction peak intensity and FWHM of the MA-based (PEA)<sub>2</sub>(CH<sub>3</sub>NH<sub>3</sub>)<sub>4</sub>Pb<sub>5</sub>I<sub>16</sub> (n=5) perovskite films with various addition ratio of NH<sub>4</sub>SCN on ITO/PEDOT:PSS substrate.

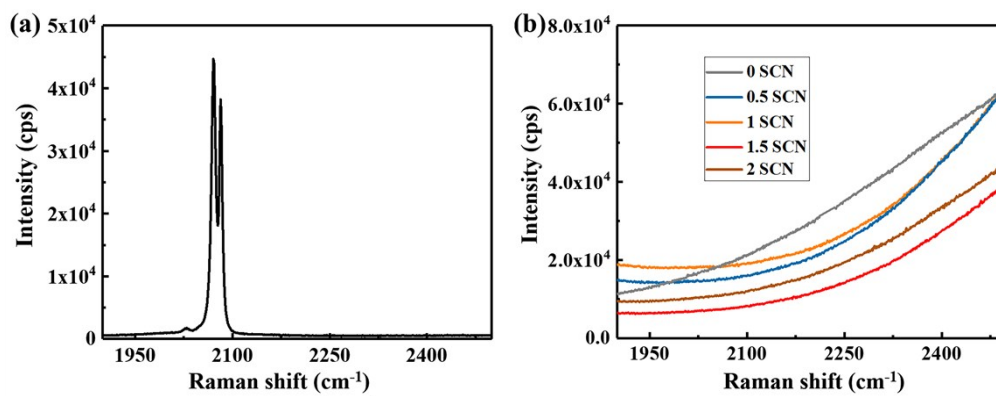

**Fig. S4.** Raman spectra of pristine NH<sub>4</sub>SCN (a) and (PEA)<sub>2</sub>(MA)<sub>4</sub>Pb<sub>5</sub>I<sub>16</sub> films with various amounts of NH<sub>4</sub>SCN addition after thermal annealing (b).

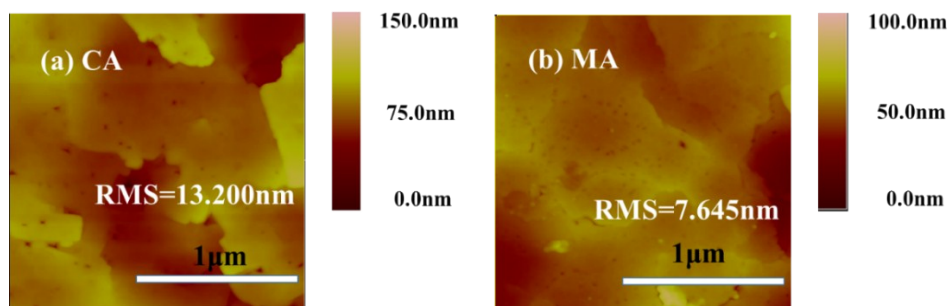

**Fig. S5** Atomic force microscopy of the  $(\text{PEA})_2(\text{CH}_3\text{NH}_3)_4\text{Pb}_5\text{I}_{16}$  ( $n=5$ ) perovskite films fabricated by (a) CA and (b) MA processes on ITO/PEDOT:PSS substrate.

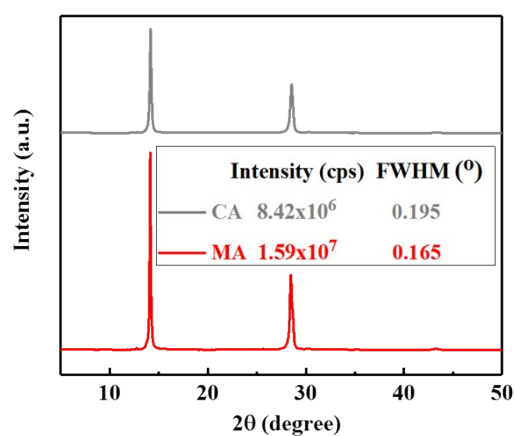

**Fig. S6** XRD patterns of perovskite films fabricated by CA and MA processes.

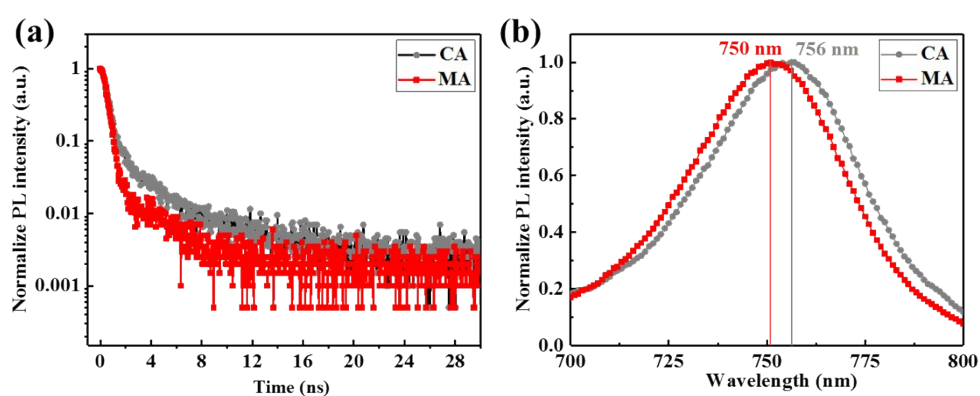

**Fig. S7** (a) Time-resolved photoluminescence measurements, (b) Steady-state photoluminescence spectra of the perovskite films on the PEDOT:PSS substrates with  $\text{PC}_{61}\text{BM}$  above.

Spectral densities of 1/f noise, shot noise and thermal noise of the MA-based device.

The 1/f noise ( $S_i(1/f)$ ) can be calculated by equation of  $S_i(1/f) = |I(f)|^2 / (F_s \times N)$ , in which  $I(f)$  is the discrete Fourier transform of the dark current waveform  $I(t)$ ,  $F_s$  is the sampling rate,  $N$  is the number of data points. The calculated spectral density of 1/f noise is shown in Fig. S8. At a modulation frequency of 10 Hz, the value of  $S_i(1/f)$  is about  $2.0 \times 10^{-21} \text{ A}^2/\text{Hz}$ .

The shot noise ( $S_i(\text{shot})$ ) can be expressed as  $S_i(\text{shot}) = 2 \times q \times I_{\text{dark}}$ , where  $q$  is the elemental charge,  $I_{\text{dark}}$  is the dark current of the device. The calculated  $S_i(\text{shot})$  is about  $9.67 \times 10^{-27} \text{ A}^2/\text{Hz}$ .

The thermal noise ( $S_i(\text{thermal})$ ) is calculated by using Nyquist's equation,  $S_i(\text{thermal}) = 4 \times k_B \times T / r$ , where  $k_B$  is the Boltzmann's constant,  $T$  is the temperature and  $r$  is the differential resistance of the device in the dark. The calculated  $S_i(\text{thermal})$  at room temperature (300K) is about  $5.00 \times 10^{-27} \text{ A}^2/\text{Hz}$ .

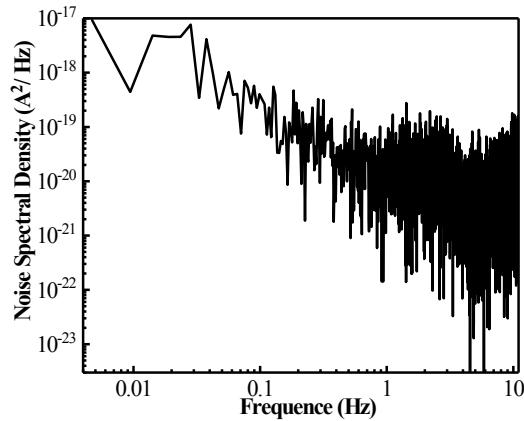

**Fig. S8** Spectral density of 1/f noise for the MA-based device at -0.1V.

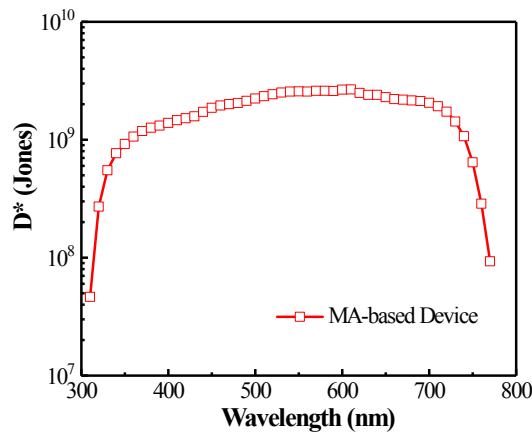

**Fig. S9** Specific detectivity of the PVSC fabricated by MA process as the function of incident wavelength.

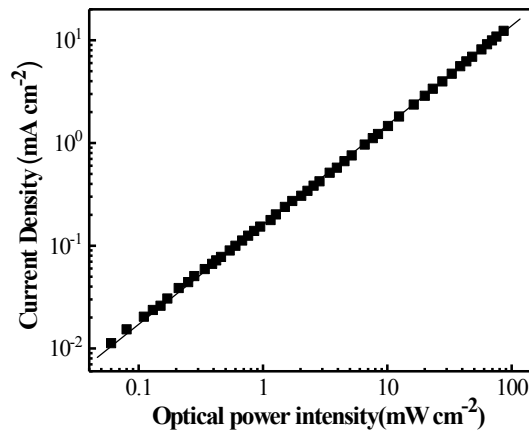

**Fig. S10** Photocurrent of MA-based device under the illumination of white light with various intensities at -0.1V bias.

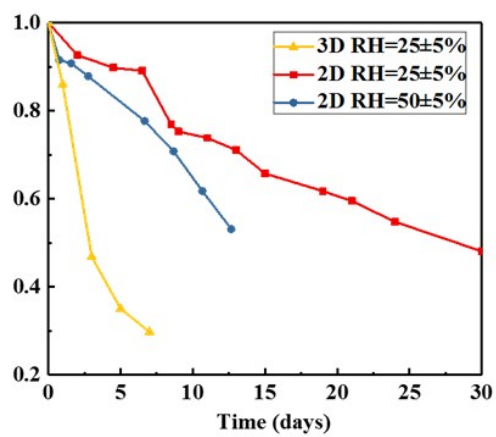

**Fig. S11** Device stability of the corresponding unencapsulated 2D, 3D PVSC in air with different humidity.

**Table S1.** Time-resolved PL data of  $(\text{PEA})_2(\text{CH}_3\text{NH}_3)_4\text{Pb}_5\text{I}_{16}$  perovskite films on ITO/PEDOT:PSS substrates.

| Method | $\tau_1$<br>(ns) | frac. $\tau_1$<br>(%) | $\tau_2$<br>(ns) | frac. $\tau_2$<br>(%) | Lifetime<br>(ns) |
|--------|------------------|-----------------------|------------------|-----------------------|------------------|
| CA     | 0.97             | 21.99                 | 12.67            | 78.01                 | 10.10            |
| MA     | 1.51             | 49.28                 | 7.77             | 50.72                 | 4.68             |
